# Supplementary material
Source: Royal Society of Chemistry journal article supplement (doi:10.1039/d6mh00262e)
Supplement: d6mh00262e1.pdf [file d6mh00262e1.pdf]

## Supporting Information

### **A Multifunctional Nano booster to Restore Ceftazidime Susceptibility in Mucoid *Pseudomonas aeruginosa***

Jia Ma<sup>1,4, †</sup>, Yiwen Yuan<sup>2, †</sup>, Xiaoyuan Ji<sup>5, †</sup>, Na Jiang<sup>2</sup>, Jiye Zhang<sup>4</sup>, Xiaojiao Li<sup>1,3\*</sup>,  
Xinghui Liu<sup>2, \*</sup>, Chang Liu<sup>2, \*</sup>

*1 Department of Medical Oncology, the First Affiliated Hospital, Xi'an Jiaotong University, Xi'an, China*

*2 Department of Clinical Laboratory, Pudong Gongli Hospital, Shanghai University of Medicine & Health Sciences, Shanghai, China*

*3 Shaanxi Engineering Research Center for Biobank and Advanced Medical Research, Biobank, the First Affiliated Hospital, Xi'an Jiaotong University, Xi'an, China*

*4 School of Pharmacy, Health Science Center, Xi'an Jiaotong University, No. 76 Yanta West Road, Xi'an, China*

*5 School of Public Health, Shanghai Jiao Tong University School of Medicine, Shanghai 200025, China*

\* Corresponding author: [cliu94@sibs.ac.cn](mailto:cliu94@sibs.ac.cn); [syliuxh@163.com](mailto:syliuxh@163.com); [lixiaojiao@xjtu.edu.cn](mailto:lixiaojiao@xjtu.edu.cn);

† These authors have contributed equally to this work

This PDF file includes:

Figs. S1 to S23

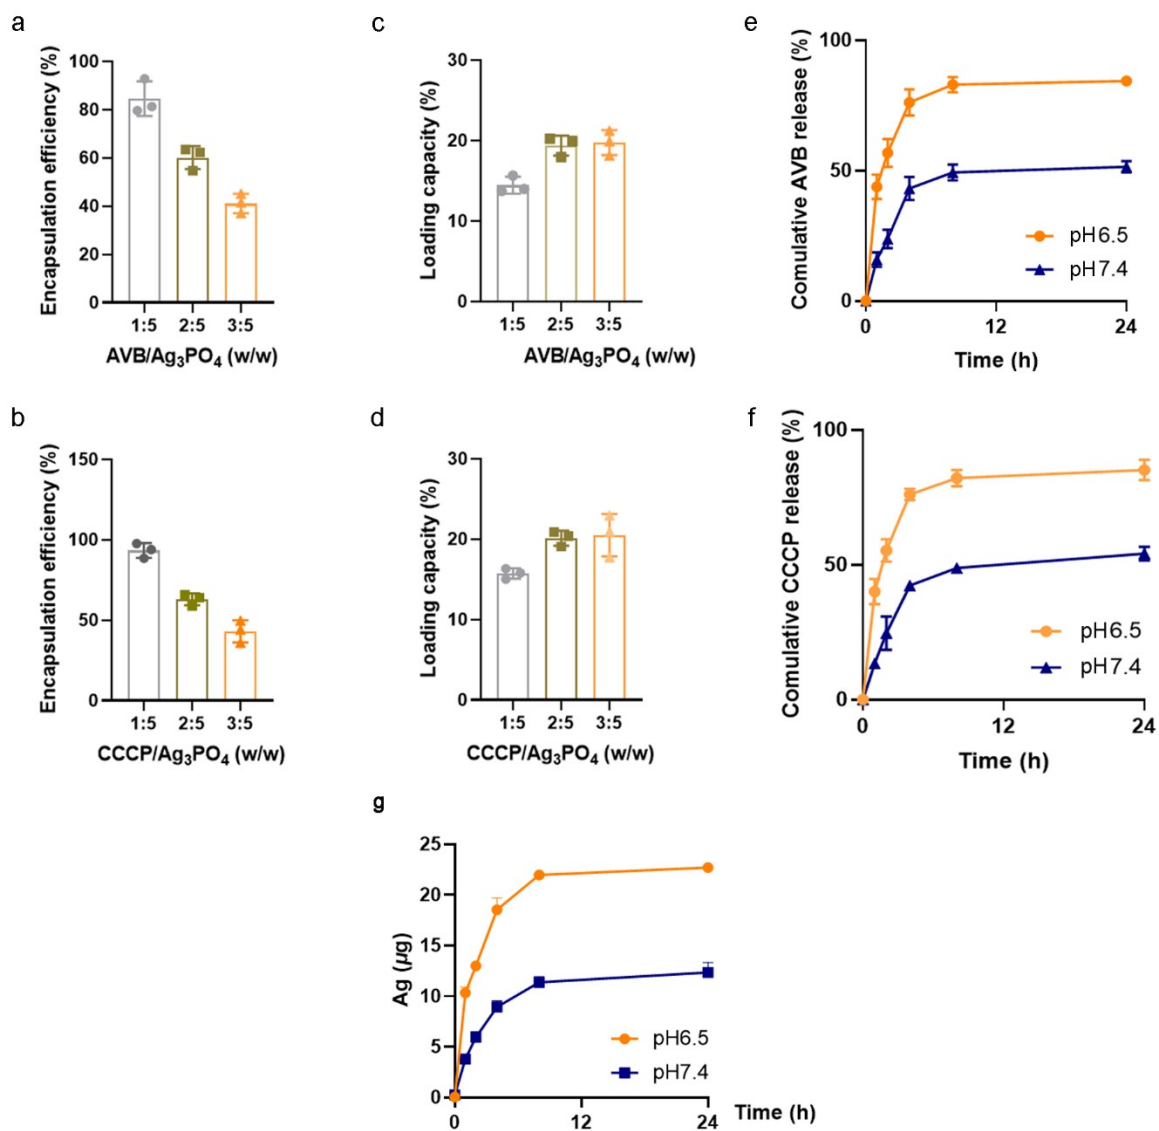

**Figure S1.** Loading and *in vitro* release behaviors of AVB, CCCP, and Ag<sup>+</sup> from A/C-pAg<sub>3</sub>PO<sub>4</sub>. (a, b) Encapsulation efficiency of AVB (a) and CCCP (b) onto pAg<sub>3</sub>PO<sub>4</sub> as a function of weight ratio (w/w). (c, d) Loading capacity of AVB (c) and CCCP (d) onto the pAg<sub>3</sub>PO<sub>4</sub> at different weight ratios (w/w). (e, f) Cumulative release profiles of AVB (e) and CCCP (f) from A/C-pAg<sub>3</sub>PO<sub>4</sub> at pH 6.5 and pH 7.4 over 24 h. (g) Cumulative release profiles of Ag<sup>+</sup> from A/C-pAg<sub>3</sub>PO<sub>4</sub> at pH 6.5 and pH 7.4 over 24 h. Data are represented as mean ± SD (n = 3).

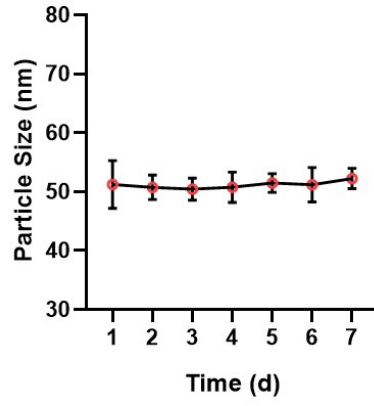

**Figure S2.** Stability of A/C-pAg<sub>3</sub>PO<sub>4</sub> in 7 days. Data are represented as mean  $\pm$  SD (n = 3).

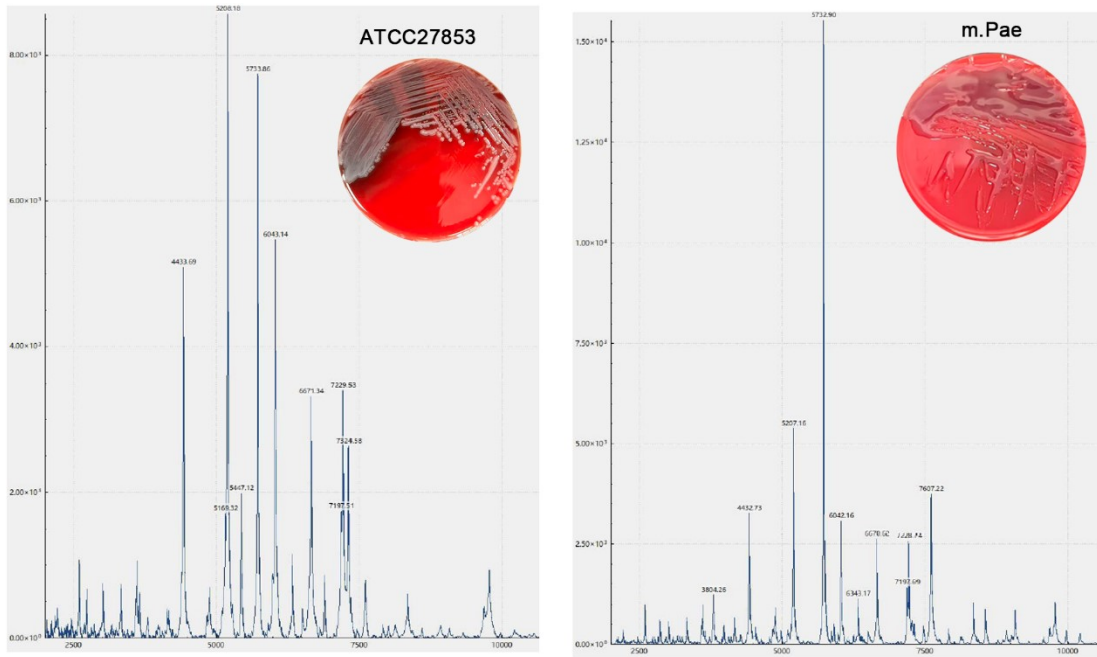

**Figure S3.** Mass spectrometry identification and photographs of the *PAE* ATCC 27853 (left) and the *m.PAE* (right).

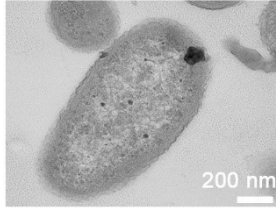

**Figure S4.** Representative TEM images of m.PAE treated with A/C-pAg<sub>3</sub>PO<sub>4</sub> for 6 h. Scale bar represents 200 nm.

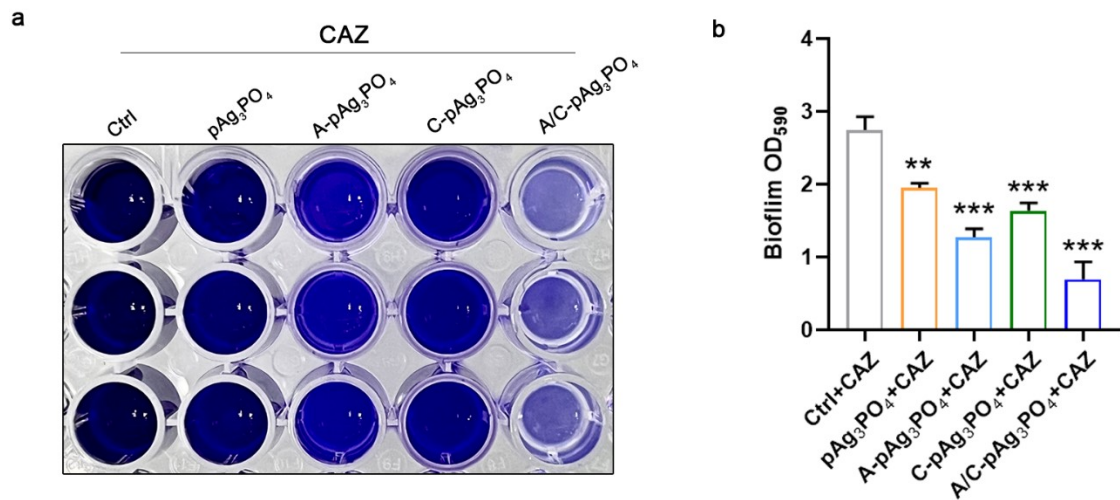

**Figure S5.** Biofilm elimination effects of nano booster. (a) Photographs of crystal-violet-stained biofilms after treatment with CAZ and nano booster. (b) Residual biofilm quantitation by crystal violet absorbance at 590 nm. Data are represented as mean  $\pm$  SD (n = 3). Student's *t*-test, \*\*  $P < 0.01$ , \*\*\*  $P < 0.001$ .

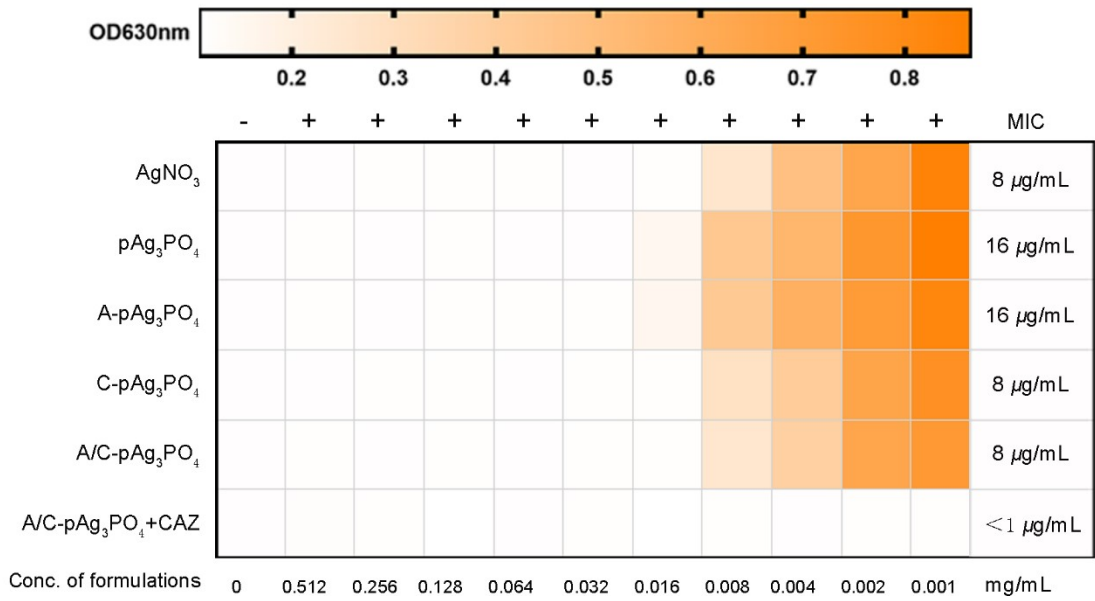

**Figure S6.** The MIC of different treatments (AgNO<sub>3</sub>, pAg<sub>3</sub>PO<sub>4</sub>, A-pAg<sub>3</sub>PO<sub>4</sub>, C-pAg<sub>3</sub>PO<sub>4</sub>, A/C-pAg<sub>3</sub>PO<sub>4</sub>, and A/C-pAg<sub>3</sub>PO<sub>4</sub>+CAZ) against the *m.PAE*.

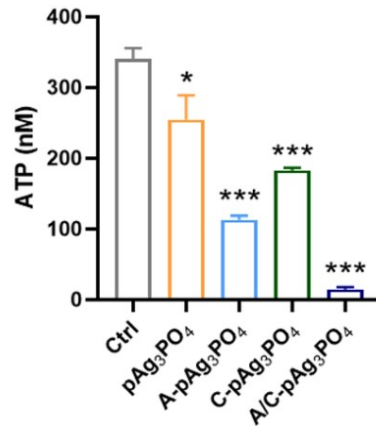

**Figure S7.** ATP levels of bacterial supernatant. Data are represented as mean  $\pm$  SD (n = 3). Student's *t*-test, \*  $P < 0.05$ , \*\*\*  $P < 0.001$ .

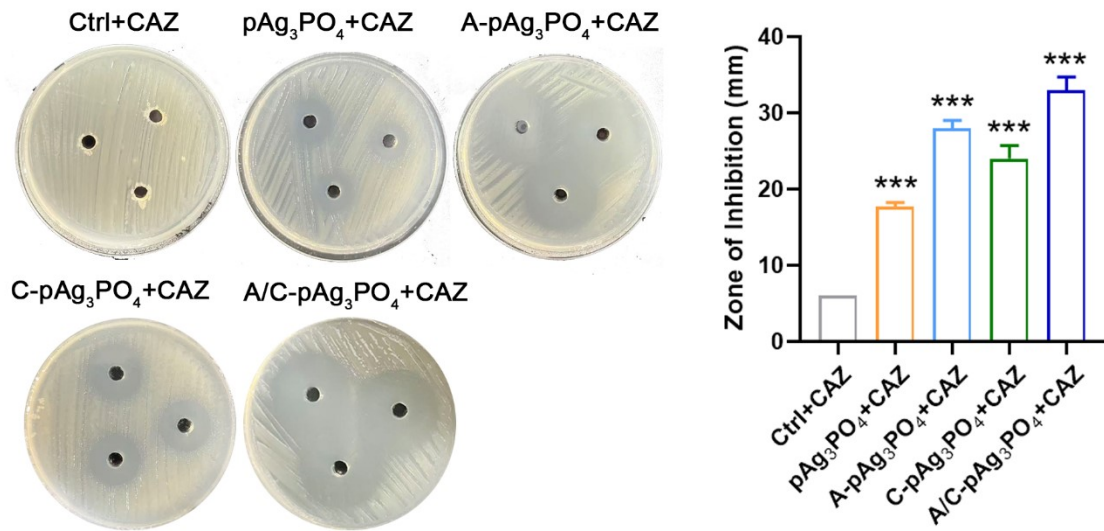

**Figure S8.** Antibacterial activity of nano booster against *m.PAE*. Data are represented as mean  $\pm$  SD ( $n = 3$ ). Student's *t*-test, \*\*\*  $P < 0.001$ .

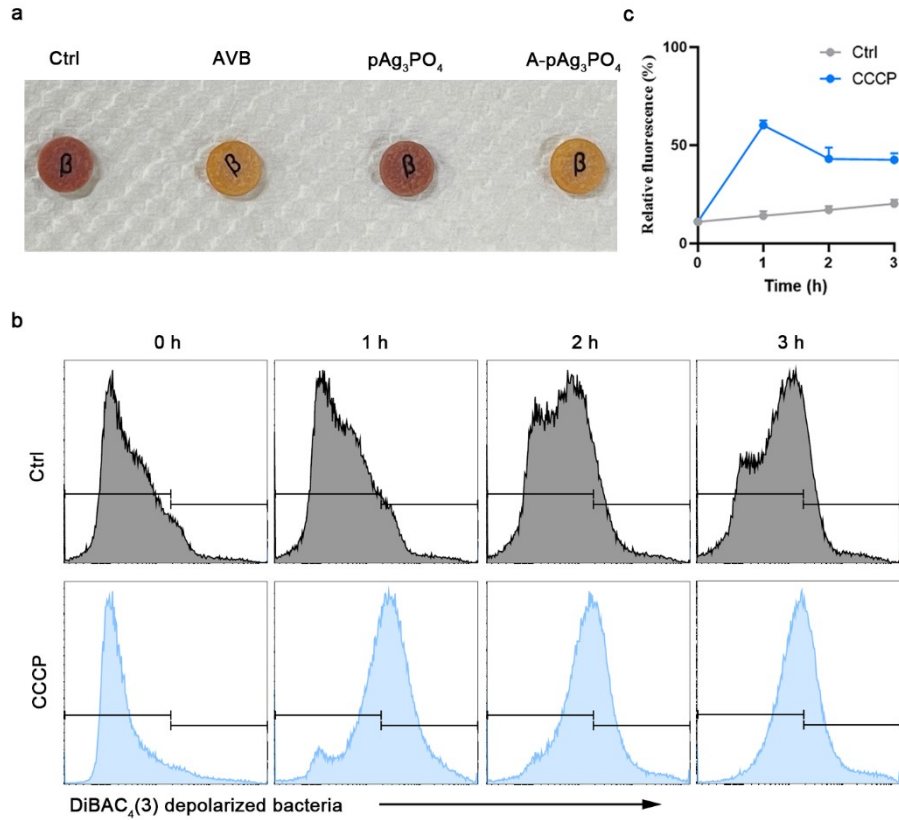

**Figure S9.** Mechanistic studies of AVB and CCCP. (a) Nitrocefin disc assay for *m.PAE* with different treatments. (b, c) Fluorescence (b) and the quantification (c) for *m.PAE* with the membrane depolarization dye DiBAC<sub>4</sub>(3). Data are represented as mean ± SD (n = 3).

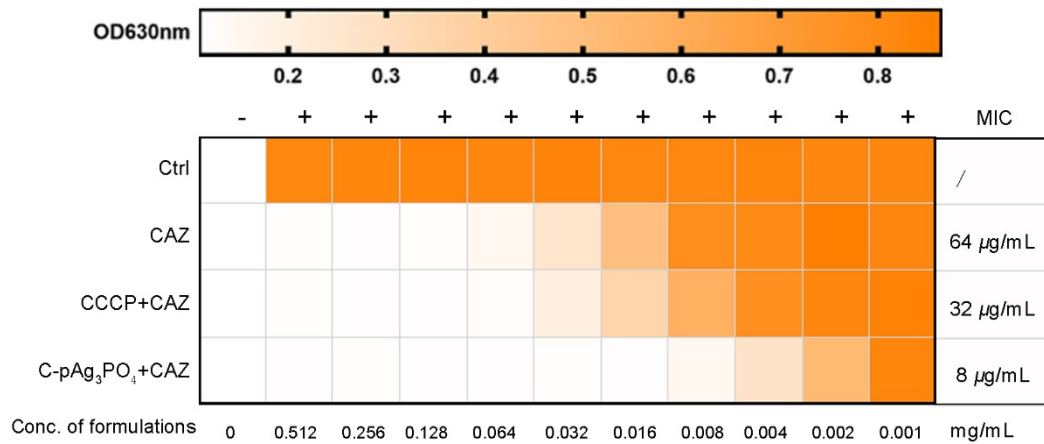

**Figure S10.** The MIC of different treatments (CAZ, CCCP+CAZ, C-pAg<sub>3</sub>PO<sub>4</sub>+CAZ) against the *m.PAE*.

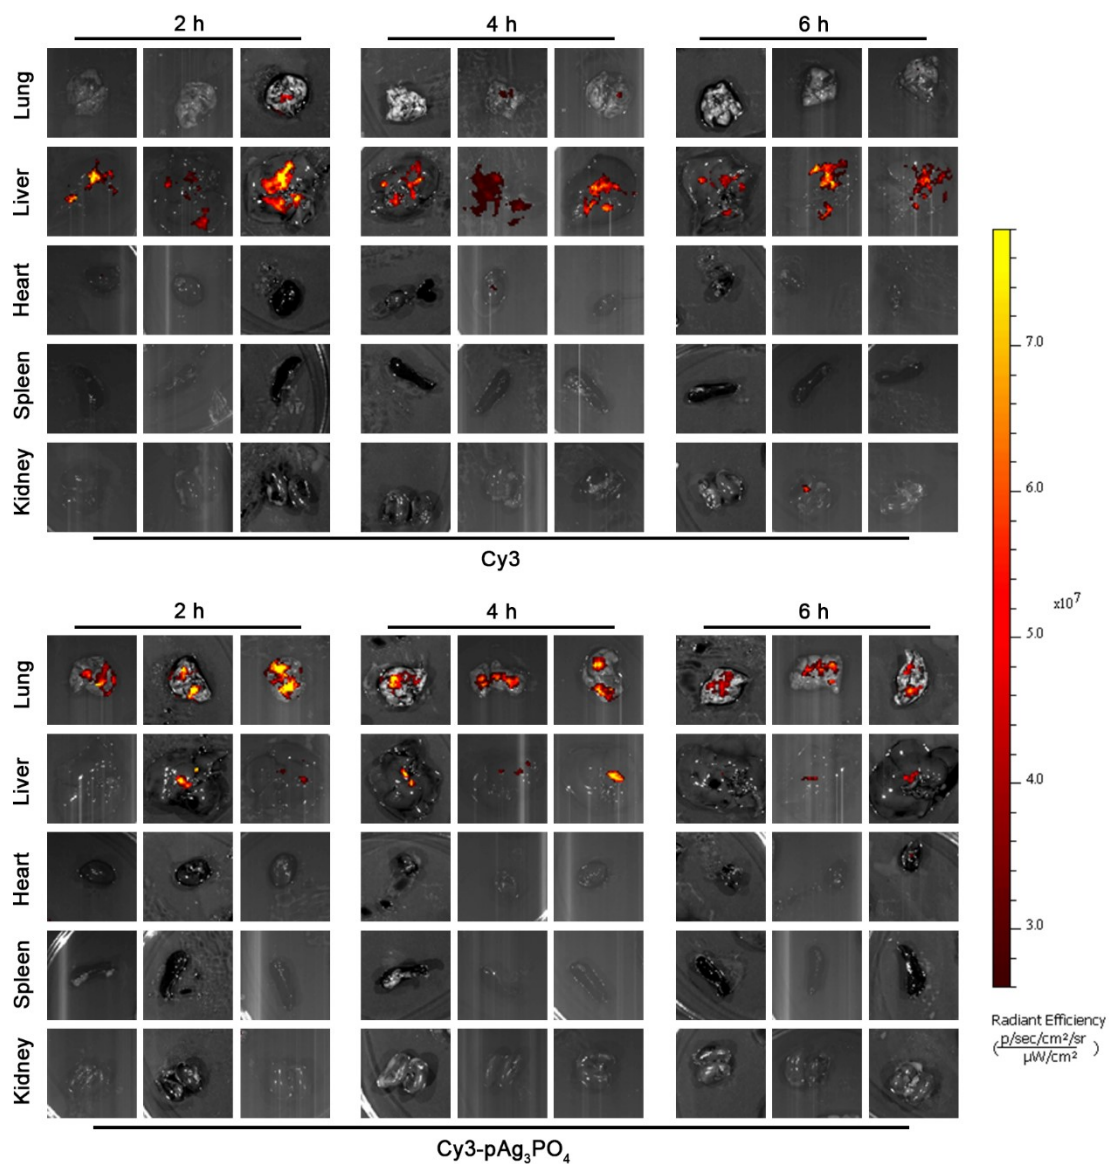

**Figure S11.** Representative *ex vivo* fluorescence images of main organs at various timepoints after intranasal administration of Cy3 or Cy3-pAg<sub>3</sub>PO<sub>4</sub>.

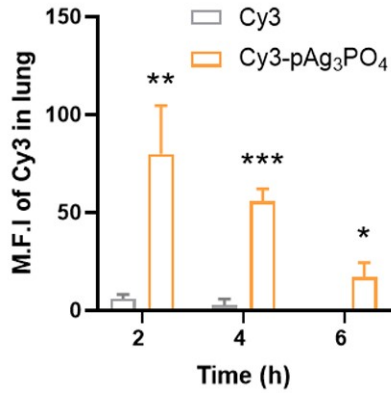

**Figure S12.** Quantification of Cy3 or Cy3-pAg<sub>3</sub>PO<sub>4</sub> (red) distribution in lung sections. Data are represented as mean  $\pm$  SD (n = 3). Student's *t*-test, \*  $P < 0.05$ , \*\*  $P < 0.01$ , \*\*\*  $P < 0.001$ .

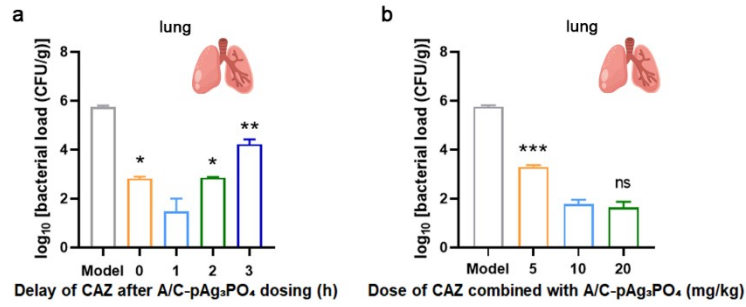

**Figure S13.** Quantitative analysis of CFUs from lung homogenates after treatment with CAZ at different time points (a) or at different doses (b) in a bacterial pneumonia model infected with *m.PAE*. Data are represented as mean  $\pm$  SD ( $n = 3$ ). Student's *t*-test, \*  $P < 0.05$ , \*\*  $P < 0.01$ , \*\*\*  $P < 0.001$ , ns means not significant.

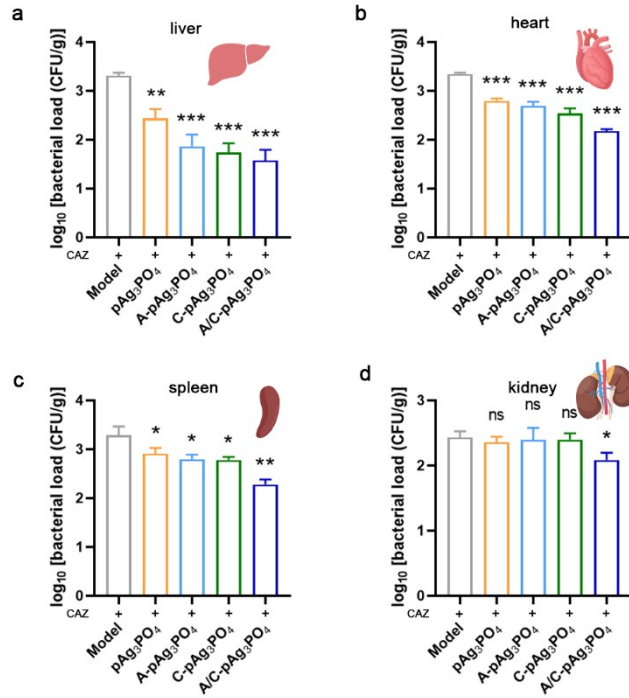

**Figure S14.** Quantitative analysis of CFUs from liver (a), heart (b), spleen (c) and kidney (d) homogenates in a bacterial pneumonia model infected with *m.PAE*. Data are represented as mean  $\pm$  SD ( $n = 3$ ). Student's *t*-test, \*  $P < 0.05$ , \*\*  $P < 0.01$ , \*\*\*  $P < 0.001$ , ns means not significant.

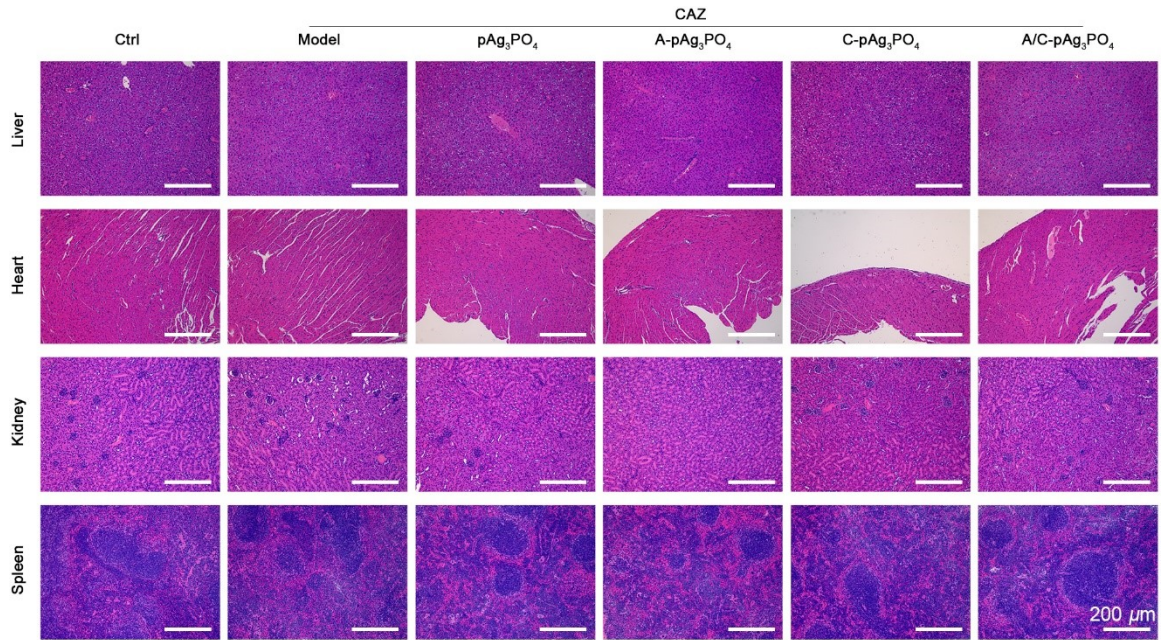

**Figure S15.** Representative H&E-stained major organ sections in a bacterial pneumonia model infected with *m.PAE*. Scale bars = 200  $\mu\text{m}$ .

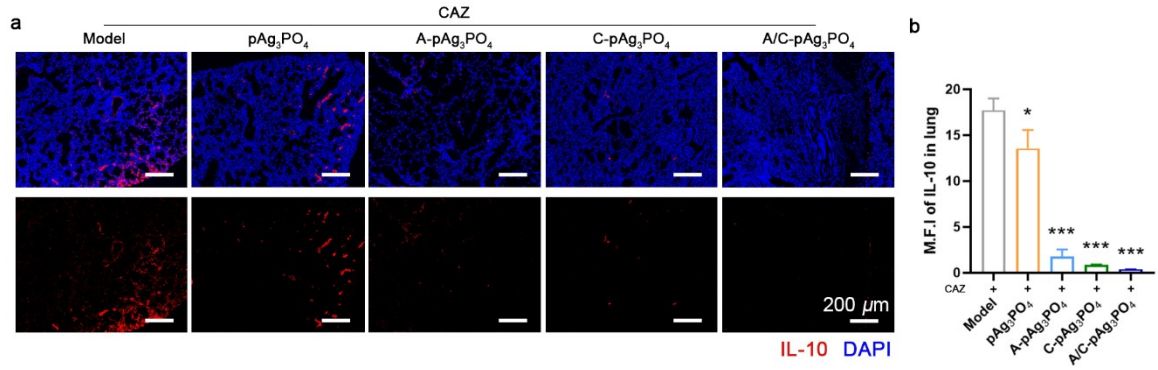

**Figure S16.** Fluorescent imaging(a) and quantifications(b) of IL-10 in lung tissues. Red: IL-10; Blue: DAPI (nuclei). Scale bars = 200  $\mu$ m. Data are represented as mean  $\pm$  SD (n = 3). Student's *t*-test, \*  $P < 0.05$ , \*\*\*  $P < 0.001$ .

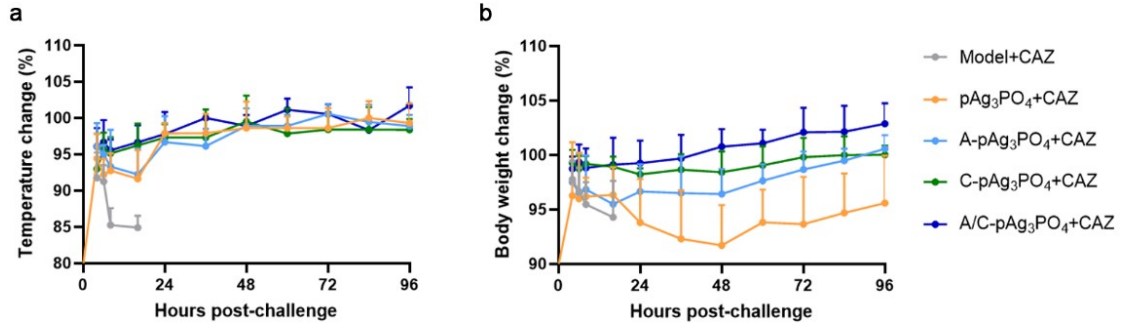

**Figure S17.** The average percent temperature change (a) and the average percent body weight change (b) of each group in a sepsis model infected with *m.PAE*. Data are represented as mean  $\pm$  SD (n = 5).

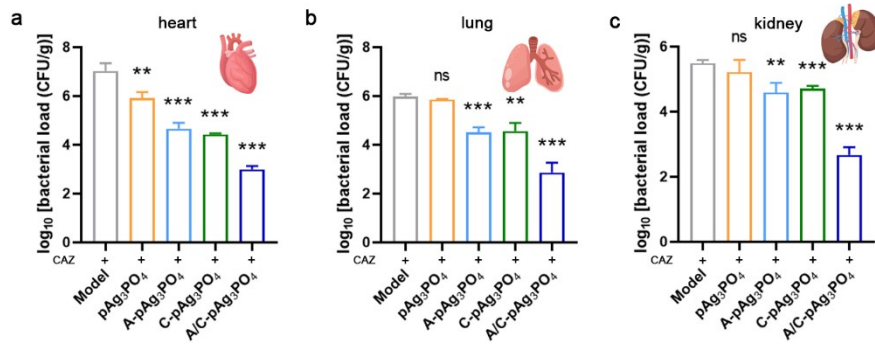

**Figure S18.** Quantitative analysis of CFUs from heart (a), lung (b) and kidney (c) homogenates in a sepsis model infected with *m.PAE*. Data are represented as mean  $\pm$  SD (n = 3). Student's *t*-test, \*\*  $P < 0.01$ , \*\*\*  $P < 0.001$ , ns means not significant.

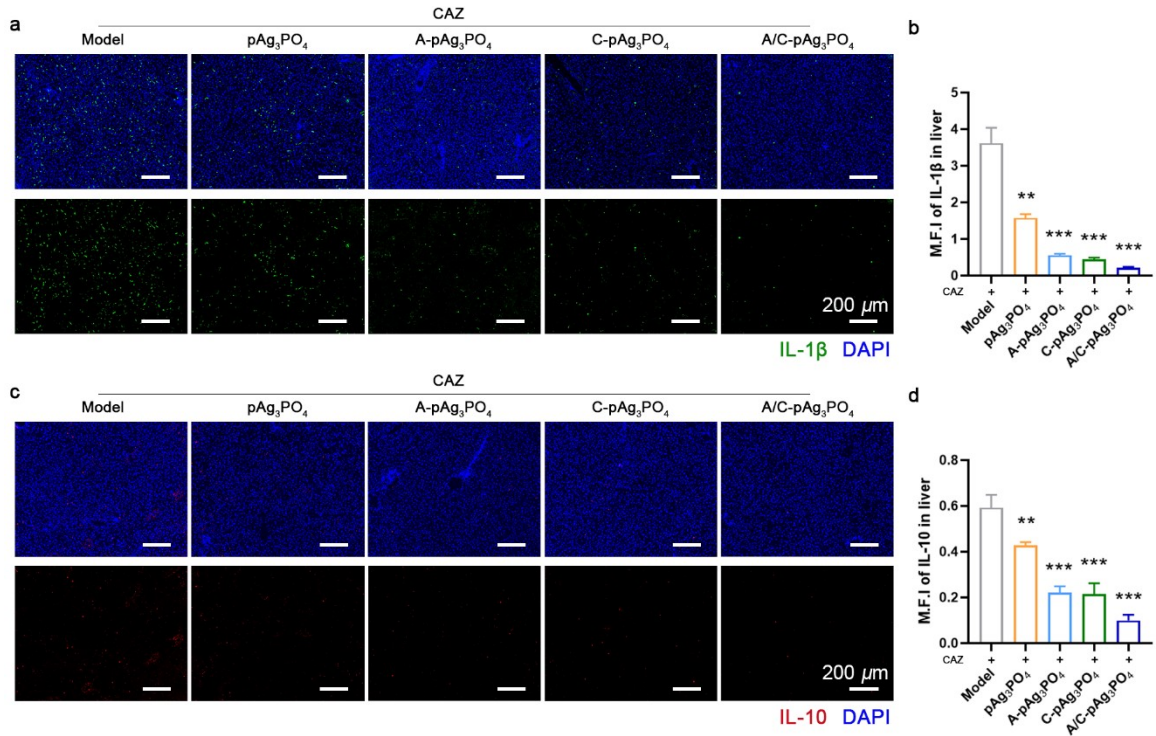

**Figure S19.** Immunofluorescence staining and quantification of IL-1 $\beta$  (a, b) and IL-10 (c, d) in liver tissues in a sepsis model infected with *m.PAE*. Green: IL-1 $\beta$ ; Red: IL-10; Blue: DAPI (nuclei). Scale bars = 200  $\mu$ m. Data are represented as mean  $\pm$  SD (n = 3). Student's *t*-test, \*\*  $P < 0.01$ , \*\*\*  $P < 0.001$ .

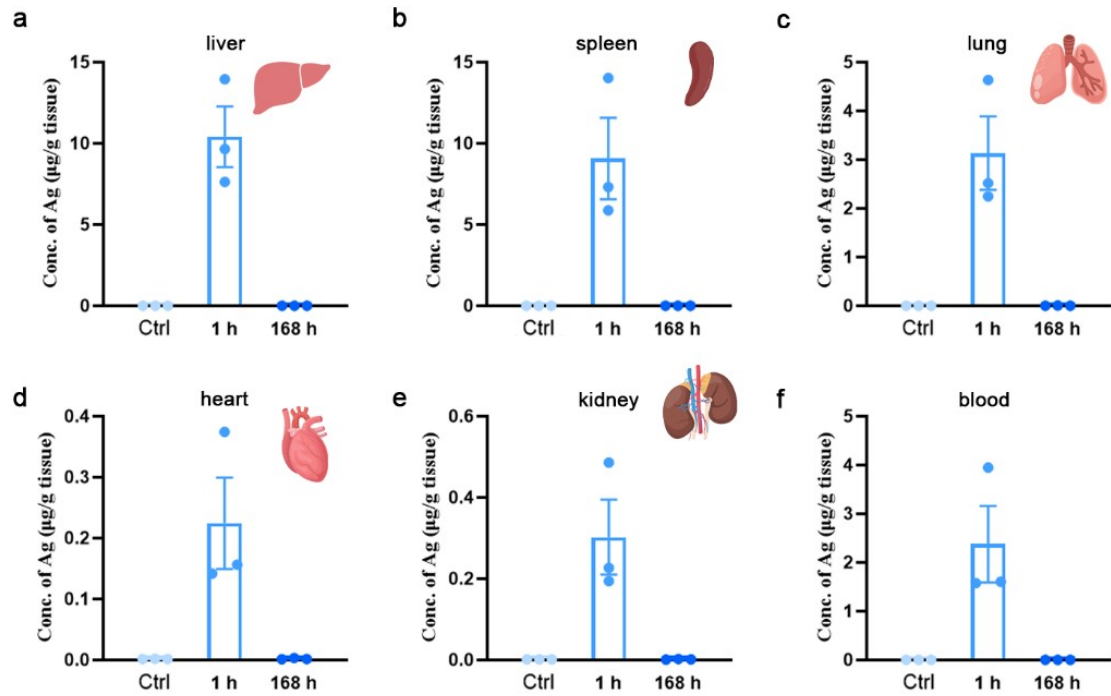

**Figure S20.** Silver concentrations in different organs ( $\mu\text{g/g}$  tissue) at different time points after A/C-pAg<sub>3</sub>PO<sub>4</sub> treatment. At Ctrl group and 168 h post-treatment group, silver content in all organs did not exceed 10 ng/g tissue.

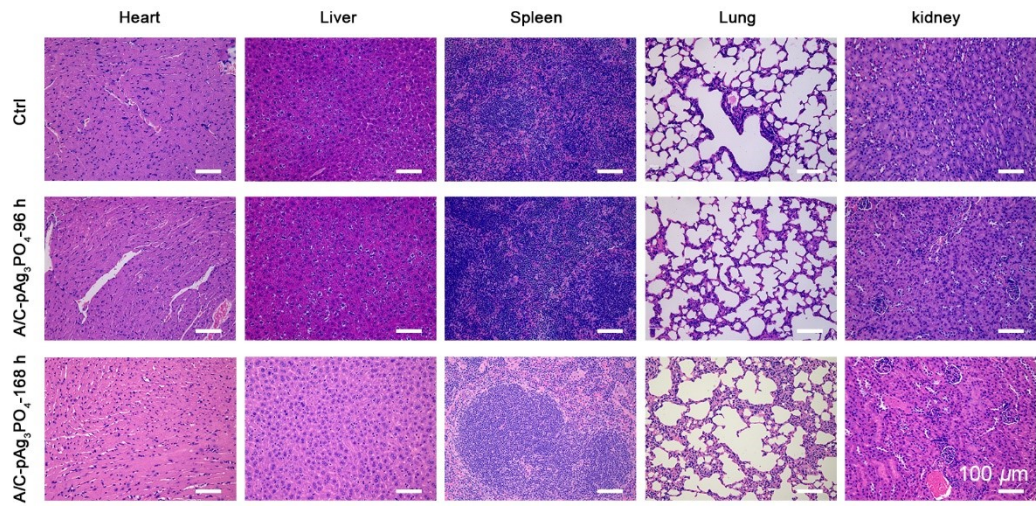

**Figure S21.** H&E staining of histology sections from major organs 96 h and 168 h after the intraperitoneal injection of A/C-pAg<sub>3</sub>PO<sub>4</sub>. Scale bars = 100 μm.

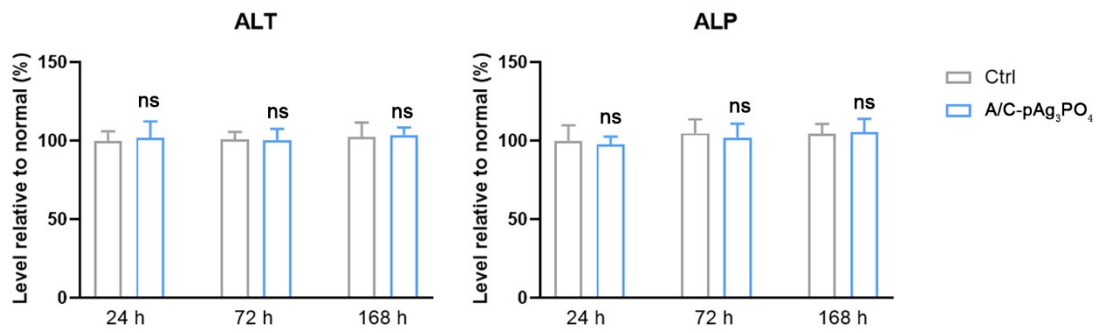

**Figure S22.** Comprehensive blood chemistry panel taken 24 h, 72 h and 168 h after the intraperitoneal injection of PBS or A/C-pAg<sub>3</sub>PO<sub>4</sub>. ALP, alkaline phosphatase; ALT, alanine transaminase. Data are represented as mean  $\pm$  SD (n = 3). Student's *t*-test, ns means not significant.

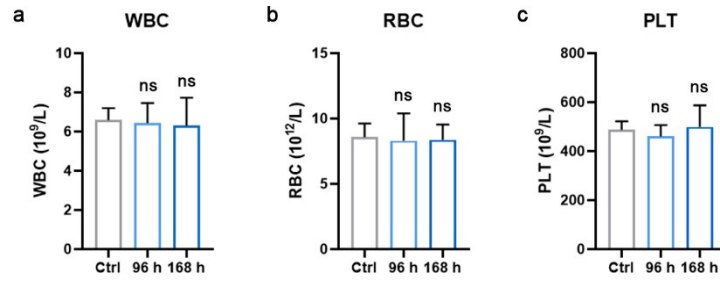

**Figure S23.** Counts of various blood cells 96 h and 168 h after the intraperitoneal injection of PBS or A/C-pAg<sub>3</sub>PO<sub>4</sub>. (a) WBC, white blood cells; (b) RBC, red blood cells; (c) PLT, platelets. Data are represented as mean  $\pm$  SD (n = 3). Student's *t*-test, ns means not significant.
